# Supplementary material
Source: MDPI journal article supplement (https://www.mdpi.com/2079-6412/12/11/1755)
Supplement: s1 [file s1]

# Synthesis and characterization of gold-shell magnetic nanowires for theranostic applications

Oana-Georgiana Dragos-Pinzaru <sup>1</sup>, Gabriela Buema <sup>1,\*</sup>, Dumitru-Daniel Herea <sup>1,\*</sup>, Horia Chiriac <sup>1</sup>, Nicoleta Lupu <sup>1</sup>, Anca Emanuela Minuti <sup>1</sup>, George Stoian <sup>1</sup>, Daniel Shore <sup>2</sup>, Valerie C. Pierre <sup>3</sup>, Ibro Tabakovic <sup>2</sup> and Bethanie J. H. Stadler <sup>2</sup>

<sup>1</sup> National Institute of R&D for Technical Physics, 700050 Iasi, Romania

<sup>2</sup> ECE Department, University of Minnesota, Minneapolis, MN 55455, USA

<sup>3</sup> Department of Chemistry, University of Minnesota, Minneapolis, MN 55455, USA

\* Correspondence: gbuema@phys-iasi.ro (G.B.); dherea@phys-iasi.ro (D.-D.H.)

## 1. Highlight section

- Gold shell magnetic nanowires were prepared by combining the pulse electrodeposition technique with the electroplating technique;
- The as-prepared core-shell nanowires microstructure, dimensions and chemical composition can be easily controlled by using this approach;
- An increase of the biocompatibility properties was observed when the gold-shell is plated;
- The CoFe@Au core-shell nanowires can be successfully used for theranostic application, the nanowires manifesting a high capacity of tumor destruction through a magneto-mechanical process, as well as a high  $r_2$  value.

## 2. XRD characterization

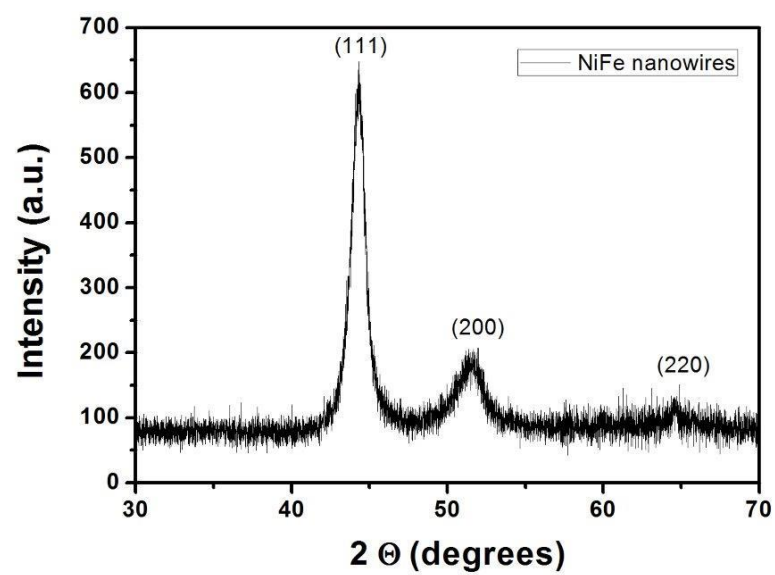

Figure S1. XRD patterns of the NiFe nanowires arrays

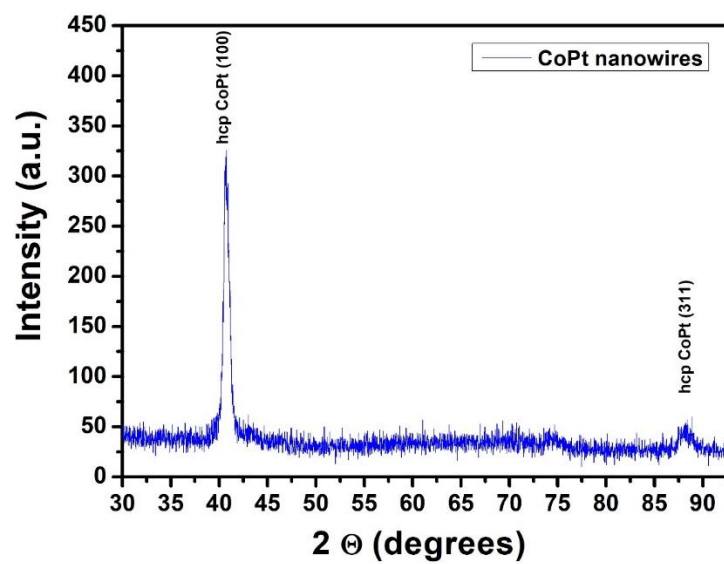

Figure S2. XRD patterns of the CoPt nanowires arrays

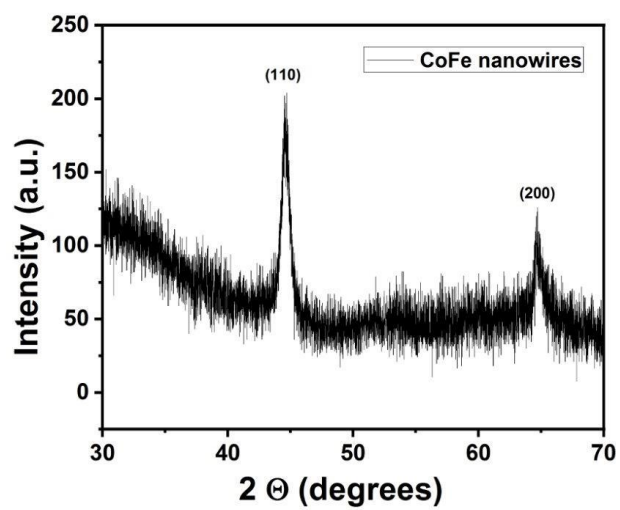

Figure S3. XRD patterns of the CoFe nanowires arrays

## 2. SEM picture of the core-shell nanowires

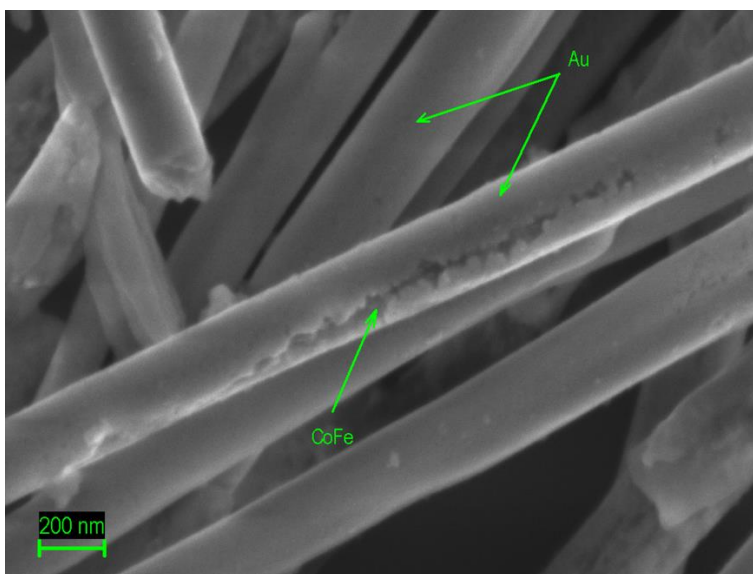

Figure S4. SEM picture of the CoFe@Au core-shell nanowires
